# Supplementary material
Source: PubMed Central journal article supplement (PMC5829024)
Supplement: NIHMS938034-supplement-Supplementary_Tabes.pdf [file NIHMS938034-supplement-Supplementary_Tabes.pdf]

SUPPLEMENTAL MATERIAL

Supplementary Table I

Performance of Prehospital LAMS  $\geq 4$  in Identifying XLVO and CSC-Appropriate Patients

|                           | XLVO Among All Cerebral Ischemia | CSC Among All Suspected Stroke Transports |
|---------------------------|----------------------------------|-------------------------------------------|
| Sensitivity               | 0.75                             | 0.72                                      |
| Specificity               | 0.54                             | 0.6                                       |
| Positive Predictive Value | 0.63                             | 0.71                                      |
| Negative Predictive Value | 0.68                             | 0.62                                      |
| Accuracy                  | 0.65                             | 0.67                                      |
| Positive Likelihood Ratio | 1.64                             | 1.81                                      |
| Negative Likelihood Ratio | 0.46                             | 0.46                                      |

Supplementary Table II

Performance of Scales in the ED in Identifying XLVO and CSC-Appropriate Patients

|                    | LVO Among All Cerebral Ischemia Patients |             |          |      |      | CSC Among All Suspected Stroke Transports |             |          |      |      |
|--------------------|------------------------------------------|-------------|----------|------|------|-------------------------------------------|-------------|----------|------|------|
|                    | Sensitivity                              | Specificity | Accuracy | PPV  | NPV  | Sensitivity                               | Specificity | Accuracy | PPV  | NPV  |
| ED LAMS            | 0.69                                     | 0.74        | 0.72     | 0.74 | 0.7  | 0.74                                      | 0.75        | 0.74     | 0.8  | 0.68 |
| ED C-STAT          | 0.61                                     | 0.83        | 0.72     | 0.79 | 0.67 | 0.52                                      | 0.83        | 0.65     | 0.8  | 0.56 |
| ED FAST-ED         | 0.61                                     | 0.8         | 0.70     | 0.76 | 0.67 | 0.59                                      | 0.8         | 0.68     | 0.8  | 0.59 |
| ED PASS            | 0.64                                     | 0.8         | 0.72     | 0.77 | 0.68 | 0.59                                      | 0.8         | 0.68     | 0.8  | 0.59 |
| ED RACE            | 0.64                                     | 0.8         | 0.72     | 0.77 | 0.68 | 0.65                                      | 0.8         | 0.71     | 0.81 | 0.63 |
| ED VAN             | 0.64                                     | 0.71        | 0.68     | 0.70 | 0.66 | 0.67                                      | 0.73        | 0.69     | 0.77 | 0.62 |
| ED 3i-SS           | 0.47                                     | 0.91        | 0.69     | 0.85 | 0.63 | 0.41                                      | 0.9         | 0.62     | 0.85 | 0.53 |
| ED NIHSS $\geq 7$  | 0.67                                     | 0.60        | 0.63     | 0.63 | 0.64 | 0.76                                      | 0.63        | 0.7      | 0.73 | 0.66 |
| ED NIHSS $\geq 10$ | 0.64                                     | 0.83        | 0.73     | 0.79 | 0.69 | 0.65                                      | 0.83        | 0.72     | 0.83 | 0.63 |
